# Supplementary material
Source: MDPI journal article supplement (https://www.mdpi.com/2073-4352/11/9/1139)
Supplement: s1 [file s1]

## Article

# Understanding of Photophysical Processes in DIO Additive-Treated PTB7:PC<sub>71</sub>BM Solar Cells

Xiaojun Su <sup>1,†</sup>, Rong Hu <sup>2,†,\*</sup>, Guanzhao Wen <sup>3,†</sup>, Xianshao Zou <sup>4</sup>, Mengyao Qing <sup>3</sup>, Jun Peng <sup>3</sup>, Xiaochuan He <sup>5</sup> and Wei Zhang <sup>3,\*</sup>

<sup>1</sup> Department of Basic Courses, Guangzhou Maritime University, Guangzhou 510725, China; suxiaojun@gzmtu.edu.cn

<sup>2</sup> School of Materials Science and Engineering, Chongqing University of Arts and Sciences, Chongqing 402160, China

<sup>3</sup> School of Physics and Materials Science, Guangzhou University, Guangzhou 510006, China; gzhwen@e.gzhu.edu.cn (G.W.); minnieq0808@gmail.com (M.Q.); speepengjun@gzhu.edu.cn (J.P.)

<sup>4</sup> Division of Chemical Physics, Department of Chemistry, Lund University, Lund 22100, Sweden; xianshao.zou@chemphys.lu.se

<sup>5</sup> Songshan Lake Materials Laboratory, Dongguan 523808, China; hlcfreelook@gmail.com

† These authors contributed equally to this work.

\* Correspondence: hurong\_82@cqw.edu.cn (R.H.); wzhang@gzhu.edu.cn (W.Z.)

**Citation:** Su, X.; Hu, R.; Wen, G.; Zou, X.; Qing, M.; Peng, J.; He, X.; Zhang, W. Understanding of Photophysical Processes in DIO Additive-Treated PTB7:PC<sub>71</sub>BM Solar Cells. *Crystals* **2021**, *11*, 1139. <https://doi.org/10.3390/cryst11091139>

Academic Editors: M. Ajmal Khan, Nrup Balar, Pratik Sen

Received: 30 August 2021

Accepted: 13 September 2021

Published: 18 September 2021

**Publisher's Note:** MDPI stays neutral with regard to jurisdictional claims in published maps and institutional affiliations.

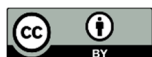

**Copyright:** © 2021 by the authors. Licensee MDPI, Basel, Switzerland. This article is an open access article distributed under the terms and conditions of the Creative Commons Attribution (CC BY) license (<http://creativecommons.org/licenses/by/4.0/>).

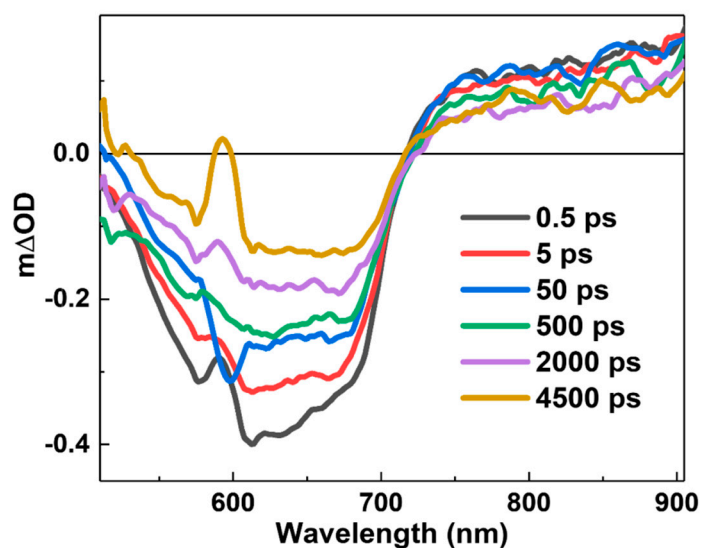

**Figure S1.** TA spectrum of PTB7:PC<sub>71</sub>BM film without DIO treatment at indicated delay times after 600 nm excitation with an excitation fluency of  $1.16 \times 10^{13}$  photon·cm<sup>-2</sup>·pulse<sup>-1</sup>.

**Table S1.** Fitting parameters of TA kinetics traces in Figure 7c.

| Sample                               | A    | $\tau$ (ps)            |
|--------------------------------------|------|------------------------|
| PTB7:PC <sub>71</sub> BM             | 0.62 | $7793.11 \pm 920.99$   |
| DIO-treated PTB7:PC <sub>71</sub> BM | 0.66 | $24891.16 \pm 6002.03$ |

### S1. Calculation of Coulomb binding energy

The electric field can be calculated by considering the thickness of active layer in neat PTB7 device (~90 nm) and external bias (10 V):

$$E = \frac{U}{d} = \frac{10}{90} \left( \frac{\text{V}}{\text{nm}} \right) = 1.11 \times 10^8 \left( \frac{\text{V}}{\text{m}} \right). \quad (1)$$

Assuming the external electric field just overcomes the Coulomb attraction between the positive and negative charge of the charge pairs:

$$E = \frac{e}{4\pi\epsilon_0\epsilon_r r^2} \quad (2)$$

where  $E$  is the external electric field,  $e$  is the elementary charge,  $\epsilon_0$  is the vacuum permittivity constant ( $8.85 \times 10^{-12}$  F/m), and  $\epsilon_r$  is the ensemble-averaged dielectric constant of the film ( $\epsilon_r = 3$ ) [1]. The distance between electron-hole  $r$  can be calculated as 2.1 nm.

Coulomb binding energy of PTB7 exciton,  $E_b$ , can be the estimated as:

$$E_b = \frac{e^2}{4\pi\epsilon_0\epsilon_r r} = 0.23 \text{ (eV)}. \quad (3)$$

### Reference

1. Hughes, M.P.; Rosenthal, K.D.; Ran, N.A.; Seifrid, M.; Bazan, G.C.; Nguyen, T.-Q. Determining the Dielectric Constants of Organic Photovoltaic Materials Using Impedance Spectroscopy. *Adv. Funct. Mater.* **2018**, *28*, 1801542. <https://doi.org/10.1002/adfm.201801542>.
